# Supplementary material
Source: MDPI journal article supplement (https://www.mdpi.com/2571-8789/8/2/54)
Supplement: s1 [file s1]

**Table S1.** List of bacteria isolated from the liquid vermicompost extract (LVE) (genus and assigned strain name), primers used for amplification and respective accession numbers.

| <b>Genus</b>                | <b>Strain</b> | <b>Primer</b> | <b>Accession no.</b> |
|-----------------------------|---------------|---------------|----------------------|
| <i>Leuconostoc</i> sp.      | LcLVE         | 104F          | PP294741             |
| <i>Leuconostoc</i> sp.      | LcLVE         | 1392R         | PP294742             |
| <i>Cytobacillus</i> sp.     | CbLVE         | 104F          | PP294755             |
| <i>Cytobacillus</i> sp.     | CbLVE         | 1392R         | PP294756             |
| <i>Bacillus</i> sp.         | Bc1LVE        | 104F          | PP294745             |
| <i>Bacillus</i> sp.         | Bc1LVE        | 1392R         | PP294746             |
| <i>Bacillus</i> sp.         | Bc2LVE        | 104F          | PP294747             |
| <i>Bacillus</i> sp.         | Bc2LVE        | 1392R         | PP294748             |
| <i>Bacillus</i> sp.         | Bc3LVE        | 104F          | PP294743             |
| <i>Bacillus</i> sp.         | Bc3LVE        | 1392R         | PP294744             |
| <i>Bacillus</i> sp.         | Bc4LVE        | 104F          | PP294759             |
| <i>Bacillus</i> sp.         | Bc4LVE        | 1392R         | PP294760             |
| <i>Pseudomonas</i> sp.      | PsLVE         | 104F          | PP294749             |
| <i>Pseudomonas</i> sp.      | PsLVE         | 1392R         | PP294750             |
| <i>Sphingobacterium</i> sp. | SbLVE         | 104F          | PP294751             |
| <i>Sphingobacterium</i> sp. | SbLVE         | 1392R         | PP294752             |
| <i>Microbacterium</i> sp.   | Mb1LVE        | 104F          | PP294753             |
| <i>Microbacterium</i> sp.   | Mb1LVE        | 1392R         | PP294754             |
| <i>Gordonia</i> sp.         | GdLVE         | 104F          | PP294757             |
| <i>Gordonia</i> sp.         | GdLVE         | 1392R         | PP294758             |
| <i>Brevundimonas</i> sp.    | BvLVE         | 104F          | PP294761             |
| <i>Brevundimonas</i> sp.    | BvLVE         | 1392R         | PP294762             |
| <i>Brucella</i> sp.         | BrLVE         | 104F          | PP294763             |
| <i>Brucella</i> sp.         | BrLVE         | 1392R         | PP294764             |
| <i>Priestia</i> sp.         | PrLVE         | 104F          | PP294765             |
| <i>Priestia</i> sp.         | PrLVE         | 1392R         | PP294766             |
